# Supplementary material for: Dietary Iron, Anemia Markers, Cognition, and Quality of Life in Older Community-Dwelling Subjects at High Cardiovascular Risk
Source: MDPI journal article supplement (doi:10.3390/nu15204440), 2023-10-19
Supplement: s1 [file s1]

## Supplemental Material S2

**Supplemental Table S1.** Cross-sectional associations of anemia markers with cognitive function, executive function, and health-related quality of life.

|                                                         | <i>Adjusted-mean difference (<math>\beta</math>) (95% CI)</i> |                |                        |                |                              |                |
|---------------------------------------------------------|---------------------------------------------------------------|----------------|------------------------|----------------|------------------------------|----------------|
|                                                         | <b>Hemoglobin (g/dl)*</b>                                     |                | <b>Hematocrit (%)*</b> |                | <b>MCV<sup>4</sup> (fL)*</b> |                |
|                                                         | <b>Model 1</b>                                                | <b>Model 2</b> | <b>Model 1</b>         | <b>Model 2</b> | <b>Model 1</b>               | <b>Model 2</b> |
| <b>Cognitive function</b>                               |                                                               |                |                        |                |                              |                |
| Minimental test <sup>1</sup>                            | 0.08                                                          | 0.06           | 0.09                   | 0.06           | 0.06                         | 0.04           |
| (Total score)                                           | (0.03, 0.13)                                                  | (0.01, 0.11)   | (0.04, 0.14)           | (0.01, 0.11)   | (0.02, 0.11)                 | (-0.00, 0.09)  |
| <b>Executive function</b>                               |                                                               |                |                        |                |                              |                |
| Trail Making Test: A, total time (seconds) <sup>2</sup> | 0.51                                                          | 0.85           | 0.01                   | 0.41           | -0.04                        | 0.32           |
|                                                         | (-0.24, 1.26)                                                 | (0.12, 1.58)   | (-0.75, 0.77)          | (-0.34, 1.16)  | (-0.74, 0.66)                | (-0.36, 1.00)  |
| Trail Making Test: B, total time (seconds) <sup>2</sup> | -3.33                                                         | -1.75          | -3.43                  | -2.01          | 0.45                         | 0.67           |
|                                                         | (-4.13, -0.54)                                                | (-3.57, 0.07)  | (-5.35, -1.51)         | (-3.85, -0.17) | (-2.21, 1.32)                | (-0.01, 2.34)  |
| Semantic verbal fluency of animals: total               | 0.19                                                          | 0.02           | 0.19                   | 0.12           | 0.13                         | 0.06           |
|                                                         | (0.07, 0.32)                                                  | (-0.10, 0.14)  | (0.07, 0.32)           | (-0.01, 0.24)  | (0.01, 0.25)                 | (-0.06, 0.17)  |
| Phonological verbal fluency of letter P: total          | 0.12                                                          | 0.05           | 0.19                   | 0.09           | 0.16                         | 0.08           |
|                                                         | (0.00, 0.24)                                                  | (-0.06, 0.16)  | (0.07, 0.31)           | (-0.03, 0.20)  | (0.05, 0.27)                 | (-0.03, 0.18)  |
| Digit total score (forward + backward)                  | 0.05                                                          | -0.02          | 0.05                   | 0.03           | 0.08                         | -0.05          |
|                                                         | (-0.10, 0.19)                                                 | (-0.16, 0.12)  | (-0.10, 0.19)          | (-0.09, 0.16)  | (-0.05, 0.21)                | (-0.16, 0.06)  |
| Clock Drawing Test                                      | 0.03                                                          | 0.02           | 0.02                   | 0.01           | 0.01                         | 0.00           |
|                                                         | (-0.01, 0.06)                                                 | (-0.02, 0.05)  | (-0.01, 0.06)          | (-0.02, 0.05)  | (-0.02, 0.04)                | (-0.03, 0.03)  |
| <b>SF36-HRQL test<sup>3</sup></b>                       | <b>Model 1</b>                                                | <b>Model 2</b> | <b>Model 1</b>         | <b>Model 2</b> | <b>Model 1</b>               | <b>Model 2</b> |
| Aggregated physical dimension                           | 0.66                                                          | 0.50           | 0.41                   | 0.28           | 0.36                         | 0.31           |
|                                                         | (0.41, 0.91)                                                  | (0.25, 0.74)   | (0.17, 0.66)           | (0.04, 0.52)   | (0.14, 0.58)                 | (0.10, 0.52)   |
| Aggregated mental dimension                             | 0.15                                                          | -0.02          | 0.27                   | 0.17           | 0.12                         | 0.10           |
|                                                         | (-0.15, 0.45)                                                 | (-0.31, 0.27)  | (-0.02, 0.57)          | (-0.11, 0.46)  | (-0.14, 0.38)                | (-0.15, 0.35)  |

\* Per 1-standard deviation increment

<sup>1</sup>MMSE: Mini-Mental State Examination

<sup>2</sup> For these tests, unlike the others, the lower the score (time), the better the cognitive function.

<sup>3</sup> Short Form-36 Health Survey for evaluating the health-related quality of life.

<sup>4</sup> Medium corpuscular volume

**Model 1** adjusted for sex, age, center, vitamin B12 and folic acid.

**Model 2** further adjusted for BMI, educational level, tobacco use, physical activity, adherence to a Mediterranean diet (score of 17 points), hours of sleep, alcohol consumption, hypertension, hypercholesterolemia, diabetes cancer and depression

**Supplemental Table S2.** Cross-sectional associations of anemia status and red blood cells with each physical dimension of the quality of life test.

|                                                 | <i>Adjusted-mean difference (<math>\beta</math>) (95% CI)</i> |                      |                       |                       |
|-------------------------------------------------|---------------------------------------------------------------|----------------------|-----------------------|-----------------------|
|                                                 | Anemia                                                        | Hemoglobin*          | Hematocrit*           | MCV <sup>2</sup> *    |
| <b>Physical dimension of the SF36-HRQL test</b> |                                                               |                      |                       |                       |
| Physical function                               | -4.60<br>(-6.79, -2.40)                                       | 0.68<br>(0.21, 1.15) | 0.81<br>(0.33, 1.30)  | 0.33<br>(-0.11, 0.77) |
| Role physical <sup>1</sup>                      | -7.74<br>(-12.7, -3.42)                                       | 1.45<br>(0.50, 2.41) | 1.33<br>(0.08, 1.47)  | 1.23<br>(0.37, 2.09)  |
| Bodily pain                                     | -3.38<br>(-6.54, -0.23)                                       | 1.19<br>(0.51, 1.86) | 0.78<br>(0.39, 1.82)  | 0.54<br>(-0.09, 1.17) |
| Vitality                                        | -2.65<br>(-5.16, -0.13)                                       | 0.77<br>(0.22, 1.32) | 0.49<br>(-0.07, 1.05) | 0.35<br>(-0.15, 0.85) |
| General health                                  | -4.91<br>(-7.17, -2.66)                                       | 0.78<br>(0.28, 1.28) | 0.06<br>(-0.44, 0.56) | 0.74<br>(0.29, 1.19)  |

Anemia was defined according to the World Health Organization (WHO) criteria of hemoglobin concentrations below 13 g/dL for men and below 12 g/dL for women.

\* Per 1-standard deviation increment

<sup>1</sup>Role limitations due to physical health problems

<sup>2</sup>Medium corpuscular volume

Estimations adjusted for sex, age, center, vitamin B12 and folic acid, BMI, educational level, tobacco use, physical activity, adherence to a Mediterranean diet (score of 17 points), hours of sleep, alcohol consumption, hypertension, hypercholesterolemia, diabetes cancer and depression.
